# Supplementary material
Source: PubMed Central journal article supplement (PMC3683360)
Supplement: NIHMS457599-supplement-439_2013_1289_MOESM1_ESM.pdf [file NIHMS457599-supplement-439_2013_1289_MOESM1_ESM.pdf]

Whole Exome Sequencing in Dominant Cataract Identifies a New Causative Factor, *CRYBA2*, and a Variety of Novel Alleles in Known Genes.

*Human Genetics*

LM Reis, RC Tyler, S Muheisen, V Raggio, L Salviati, DP Han, D Costakos, H Yonath, S Hall, P Power, EV Semina.

Corresponding Authors: Elena V. Semina, Department of Pediatrics and Cell Biology, Neurobiology and Anatomy; Children's Research Institute and Medical College of Wisconsin, Milwaukee, WI, 53226 USA. Email: [esemina@mcw.edu](mailto:esemina@mcw.edu)
