# Supplementary material
Source: PubMed Central journal article supplement (PMC3683360)
Supplement: NIHMS457599-supplement-439_2013_1289_MOESM2_ESM.pdf [file NIHMS457599-supplement-439_2013_1289_MOESM2_ESM.pdf]

**Online Resource 2:** Summary of WES data for all probands included in this study.

| Patient #  | Primary Phenotype <sup>a</sup>                                                     | Whole Exome data           |                                 |                                      |                    | Known cataract (36) and additional crystallin genes (8) data |                     |           |              |
|------------|------------------------------------------------------------------------------------|----------------------------|---------------------------------|--------------------------------------|--------------------|--------------------------------------------------------------|---------------------|-----------|--------------|
|            |                                                                                    | Target coverage $\geq 10X$ | Mean read depth (target region) | Total SNP (exon+splice) <sup>b</sup> | Total indel (exon) | Total SNP (exon+splice)                                      | Non-synonymous SNPs | Non dbSNP | Coding indel |
| Patient 1  | Congenital cataract; <i>glaucoma</i>                                               | 85.0%                      | 67X                             | 29,215                               | 1,175              | 49                                                           | 13                  | 1         | 0            |
| Patient 2  | Congenital cataract; <i>microcornea, glaucoma</i>                                  | 84.8%                      | 72X                             | 29,273                               | 1,116              | 46                                                           | 11                  | 1         | 0            |
| Patient 3  | Congenital cataract; <i>glaucoma</i>                                               | 86.1%                      | 91X                             | 30,904                               | 1,330              | 38                                                           | 8                   | 1         | 0            |
| Patient 4  | Congenital cataract; <i>glaucoma, myopia</i>                                       | 82.2%                      | 63X                             | 28,229                               | 1,003              | 41                                                           | 14                  | 2         | 0            |
| Patient 5  | Congenital anterior polar cataract                                                 | 84.1%                      | 67X                             | 28,559                               | 1,039              | 41                                                           | 10                  | 0         | 0            |
| Patient 6  | Congenital nuclear cataract, hyperopia, strabismus                                 | 83.2%                      | 59X                             | 28,991                               | 1,090              | 40                                                           | 6                   | 1         | 0            |
| Patient 7  | Congenital cataract; <i>glaucoma</i>                                               | 83.4%                      | 62X                             | 28,524                               | 1,053              | 37                                                           | 10                  | 2         | 0            |
| Patient 8  | Congenital cataract                                                                | 81.5%                      | 50X                             | 28,490                               | 982                | 49                                                           | 13                  | 0         | 0            |
| Patient 9  | Unilateral or bilateral congenital cataract                                        | 83.1%                      | 60X                             | 28,732                               | 1,074              | 44                                                           | 11                  | 0         | 1            |
| Patient 10 | Congenital cataract, <i>strabismus</i>                                             | 88.4%                      | 114X                            | 31,629                               | 1,398              | 52                                                           | 12                  | 1         | 0            |
| Patient 11 | Congenital cataract; <i>pupil defects, glaucoma</i>                                | 81.6%                      | 53X                             | 27,734                               | 1,000              | 43                                                           | 14                  | 1         | 0            |
| Patient 12 | Congenital cataract                                                                | 85.6%                      | 72X                             | 29,949                               | 1,166              | 42                                                           | 9                   | 2         | 0            |
| Patient 13 | Juvenile cataract                                                                  | 83.5%                      | 62X                             | 29,193                               | 1,128              | 45                                                           | 9                   | 0         | 0            |
| Patient 14 | Juvenile cataract                                                                  | 83.6%                      | 65X                             | 28,468                               | 1,090              | 43                                                           | 11                  | 1         | 0            |
| Patient 15 | Congenital cataract                                                                | 93.3%                      | 72X                             | 43,433                               | 4,367              | 79                                                           | 16                  | 2         | 0            |
| Patient 16 | Congenital cataract                                                                | 88.1%                      | 71X                             | 43,186                               | 3,950              | 79                                                           | 9                   | 0         | 0            |
| Patient 17 | Congenital cataract                                                                | 96.2%                      | 72X                             | 43,311                               | 4,441              | 87                                                           | 13                  | 0         | 0            |
| Patient 18 | Congenital cataract; <i>microphthalmia/ microcornea, glaucoma, corneal opacity</i> | 95.6%                      | 65X                             | 42,836                               | 4,452              | 95                                                           | 14                  | 2         | 0            |
| Patient 19 | Congenital cataract, nystagmus; <i>glaucoma, corneal opacity</i>                   | 88.1%                      | 62X                             | 43,489                               | 4,237              | 88                                                           | 13                  | 2         | 0            |
| Patient 20 | Juvenile cataract; <i>glaucoma</i>                                                 | 80.6%                      | 72X                             | 39,966                               | 3,635              | 75                                                           | 12                  | 0         | 0            |
| Patient 21 | Juvenile cataract (unilateral)                                                     | 78.6%                      | 59X                             | 43,915                               | 3,816              | 96                                                           | 12                  | 1         | 0            |
| Patient 22 | Congenital cataract, microcornea, coloboma, <i>glaucoma, macrocephaly</i>          | 96.00%                     | 78X                             | 41,164                               | 4,512              | 92                                                           | 11                  | 1         | 0            |
| Patient 23 | Early onset adult cataract (40s), retinal detachment                               | 94.9%                      | 68X                             | 43,254                               | 4,401              | 82                                                           | 12                  | 2         | 0            |

<sup>a</sup>variable features within the family are noted in italics; <sup>b</sup>read depth  $\geq 8$ , score  $\geq 20$

**Online Resource 3:** List of known cataract genes evaluated in this study.

| <b>Gene</b>     | <b>MIM</b> | <b>Locus</b> | <b>Inheritance</b> |
|-----------------|------------|--------------|--------------------|
| <i>FOXE3</i>    | 601094     | 1p32         | AD                 |
| <i>CRYGA</i>    | 123660     | 2q33-35      | AD                 |
| <i>CRYGC</i>    | 123680     | 2q33-35      | AD                 |
| <i>CRYGD</i>    | 123690     | 2q33-35      | AD                 |
| <i>BFSP2</i>    | 603212     | 3q21-25      | AD                 |
| <i>CRYGS</i>    | 123730     | 3q27         | AD                 |
| <i>EYA1</i>     | 601653     | 8q13.3       | AD                 |
| <i>VIM</i>      | 193060     | 10p13        | AD                 |
| <i>SLC16A12</i> | 611910     | 10q23.31     | AD                 |
| <i>PITX3</i>    | 602669     | 10q25        | AD                 |
| <i>PAX6</i>     | 607108     | 11p13        | AD                 |
| <i>MIP</i>      | 154050     | 12q13        | AD                 |
| <i>GJA3</i>     | 121015     | 13q11        | AD                 |
| <i>MAF</i>      | 177075     | 16q22-23     | AD                 |
| <i>CRYBA1</i>   | 123610     | 17q11.1-12   | AD                 |
| <i>FTL</i>      | 134790     | 19q13.3-4    | AD                 |
| <i>CHMP4B</i>   | 610897     | 20q11.21     | AD                 |
| <i>CRYBA4</i>   | 123631     | 22q11.2-13.1 | AD                 |
| <i>CRYBB2</i>   | 123620     | 22q11.2-12.1 | AD                 |
| <i>EPHA2</i>    | 176946     | 1p36         | AD or AR           |
| <i>GJA8</i>     | 600897     | 1q21.1       | AD or AR           |
| <i>SIL1</i>     | 608005     | 5q31         | AD or AR           |
| <i>CRYAB</i>    | 123590     | 11q22.3-23.1 | AD or AR           |
| <i>HSF4</i>     | 602438     | 16q21-22.1   | AD or AR           |
| <i>CRYAA</i>    | 123580     | 21q22.3      | AR or AD           |
| <i>CRYBB1</i>   | 600929     | 22q11.2-12.1 | AR or AD           |
| <i>PXDN</i>     | 605158     | 2p25.3       | AR                 |
| <i>GCNT2</i>    | 600429     | 6p24         | AR                 |
| <i>TDRD7</i>    | 611258     | 9q22.33      | AR                 |
| <i>GALK1</i>    | 604313     | 17q25.1      | AR                 |
| <i>LIM2</i>     | 154045     | 19q13.4      | AR                 |
| <i>BFSP1</i>    | 603307     | 20p12.1      | AR                 |
| <i>CRYBB3</i>   | 123630     | 22q11.2-12.2 | AR                 |
| <i>FYCO1</i>    | 607182     | 3p21.31      | AR                 |
| <i>AGK</i>      | 610345     | 7q34         | AR                 |
| <i>NHS</i>      | 300457     | Xp22.13      | X                  |

Inh = Inheritance; AD = Autosomal dominant; AR = Autosomal recessive; X = X-linked.

**Online Resource 4:** Rare and novel variants determined to be non-causative.

| Samples with SNP | Gene         | Reference sequence | Nucleotide change | Amino acid change | dbSNP       | Allele frequency (EVS)  | PolyPhen/ SIFT prediction         | Cosegregation analysis | Causative mutation |
|------------------|--------------|--------------------|-------------------|-------------------|-------------|-------------------------|-----------------------------------|------------------------|--------------------|
| Patient 1        | <i>BFSP1</i> | NM_001195.3        | c.1895C>A         | p.(Ser632Tyr)     | -           | 0/8600 EA<br>0/4352 AA  | probably damaging/<br>deleterious | No cosegregation       | -                  |
| Patient 1        | <i>CRYGN</i> | NM_144727.1        | c.97C>T           | p.(Arg33Trp)      | rs145702098 | 2/8600 EA<br>0/4406 AA  | benign/ deleterious               | No cosegregation       | -                  |
| Patient 2        | <i>GJA8</i>  | NM_005267.4        | c.741T>G          | p.(Ile247Met)     | rs80358202  | 31/8600 EA<br>1/4406 AA | benign/ tolerated                 | No cosegregation       | <i>CRYBB1</i>      |
| Patient 4        | <i>BFSP2</i> | NM_003571.2        | c.265C>T          | p.(Arg89Trp)      | -           | 3/8600 EA<br>0/4406 AA  | probably damaging/<br>tolerated   | No cosegregation       | <i>CRYBA2</i>      |
| Patient 4        | <i>BFSP2</i> | NM_003571.2        | c.437G>A          | p.(Arg146His)     | rs148759360 | 0/8600 EA<br>0/4406 AA  | possibly damaging/<br>tolerated   | No cosegregation       | <i>CRYBA2</i>      |
| Patient 4        | <i>CRYGS</i> | NM_017541.2        | c.305G>A          | p.(Gly102Glu)     | rs144124671 | 5/8600 EA<br>3/4406 AA  | benign/ tolerated                 | No cosegregation       | <i>CRYBA2</i>      |
| Patient 7        | <i>GCNT2</i> | NM_145649.4        | c.892G>A          | p.(Glu298Lys)     | rs139794913 | not covered             | probably damaging/<br>tolerated   | No cosegregation       | <i>CRYBB3</i>      |
| Patient 12       | <i>HSF4</i>  | NM_001538.3        | c.636G>T          | p.(Met212Ile)     | -           | 28/8448 EA<br>4/4182 AA | possibly damaging/<br>deleterious | No cosegregation       | -                  |
| Patient 12       | <i>FYCO1</i> | NM_024513.3        | c.3320A>G         | p.(Asn1107Ser)    | -           | 0/8568 EA<br>0/4390 AA  | benign/ tolerated                 | No cosegregation       | -                  |
| Patient 18       | <i>SILI</i>  | NM_022464.4        | c.274C>T          | p.(Arg92Trp)      | rs149242794 | 1/8600 EA<br>0/4406 AA  | probably damaging/<br>deleterious | No cosegregation       | <i>CRYGC</i>       |
| Patient 19       | <i>FYCO1</i> | NM_024513.3        | c.3698G>A         | p.(Gly1233Asp)    | -           | 0/8600 EA<br>0/4406 AA  | benign/ tolerated                 | No cosegregation       | -                  |
| Patient 19       | <i>AGK</i>   | NM_018238.3        | c.952C>T          | p.(Arg318Trp)     | -           | 0/8578 EA<br>0/4392 AA  | possibly damaging/<br>deleterious | No cosegregation       | -                  |
| Patient 21       | <i>GCNT2</i> | NM_145649.4        | c.35C>T           | p.(Ala12Val)      | rs150732107 | not covered             | benign/ tolerated                 | No cosegregation       | -                  |
| Patient 23       | <i>FOXE3</i> | NM_012186.2        | c.587G>C          | p.(Gly196Ala)     | -           | not covered             | benign/ tolerated                 | No cosegregation       | -                  |
| Patient 23       | <i>CRYGD</i> | NM_006891.3        | c.51T>G           | p.(Tyr17*)        | -           | 0/8582 EA<br>0/4384 AA  | N/A (truncation)                  | No cosegregation       | -                  |

Whole Exome Sequencing in Dominant Cataract Identifies a New Causative Factor, *CRYBA2*, and a Variety of Novel Alleles in Known Genes.

*Human Genetics*

LM Reis, RC Tyler, S Muheisen, V Raggio, L Salviati, DP Han, D Costakos, H Yonath, S Hall, P Power, EV Semina.

Corresponding Authors: Elena V. Semina, Department of Pediatrics and Cell Biology, Neurobiology and Anatomy; Children's Research Institute and Medical College of Wisconsin, Milwaukee, WI, 53226 USA. Email: [esemina@mcw.edu](mailto:esemina@mcw.edu)
